# Supplementary material
Source: PubMed Central journal article supplement (PMC6650705)
Supplement: rspb20190810supp1.pdf [file rspb20190810supp1.pdf]

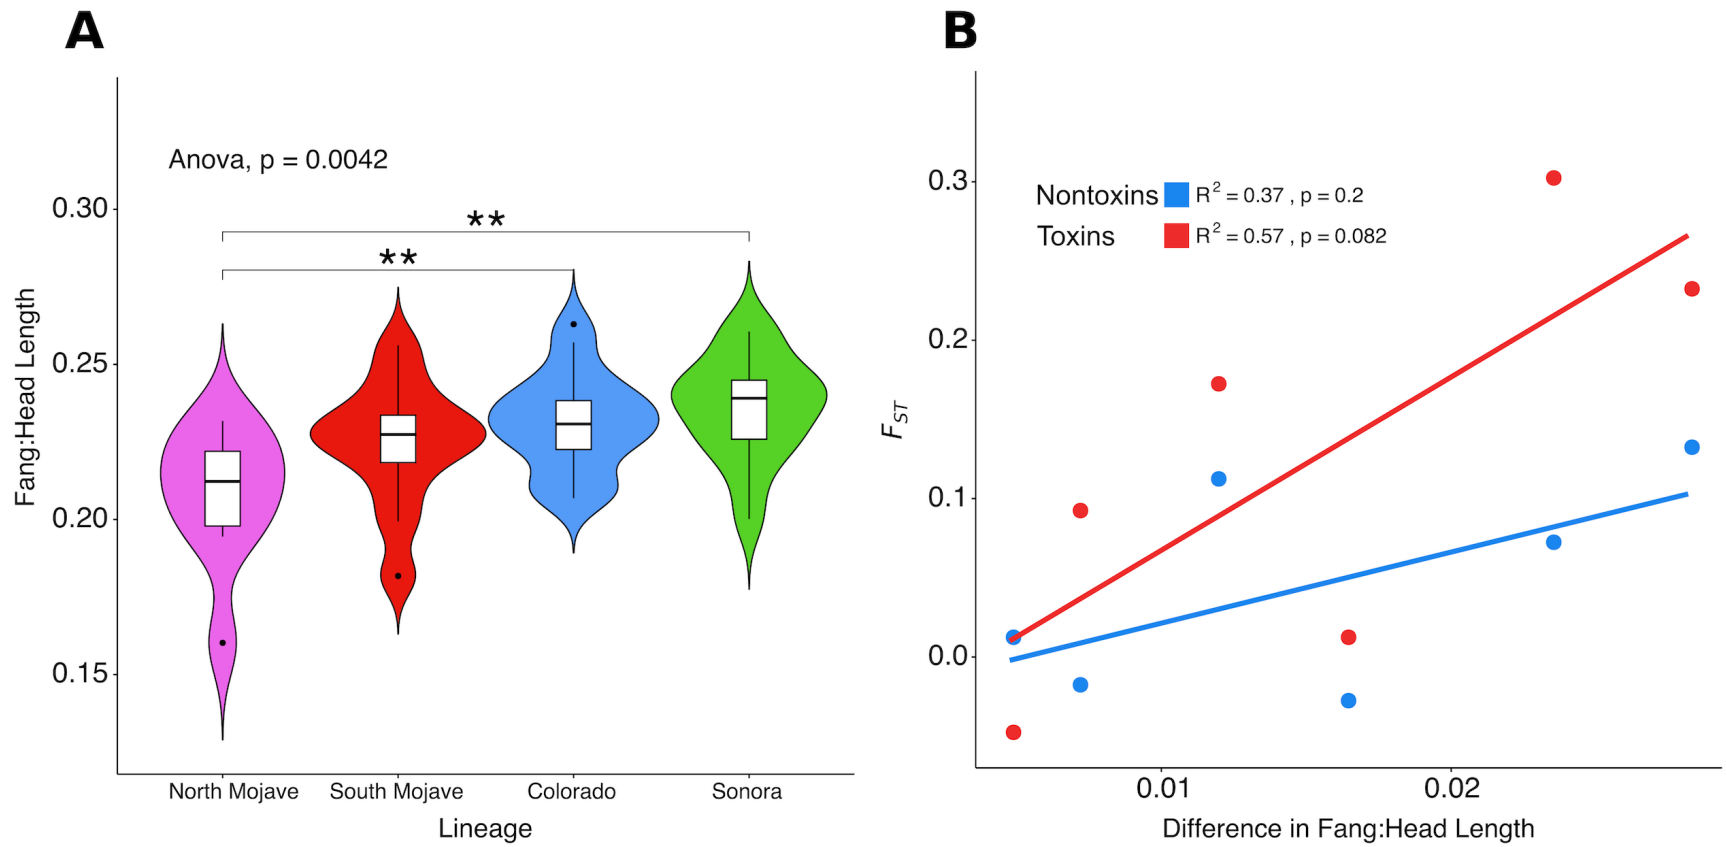

**Figure S1.** (A) Ratio of fang to head length between lineages showing that the North Mojave lineage is significant different from both the Colorado and Sonoran lineages. Colors correspond to phylogeny in Fig. 1. (B) Correlation of the difference in fang:head length and  $F_{ST}$  showing that toxin  $F_{ST}$  is significantly different than nontoxins. Colors correspond to toxins and nontoxins
